# Supplementary material for: Inhibition of Drp1–Filamin Protein Complex Prevents Hepatic Lipid Droplet Accumulation by Increasing Mitochondria–Lipid Droplet Contact
Source: MDPI journal article supplement (doi:10.3390/ijms25105446), 2024-05-17
Supplement: s1 [file s1]

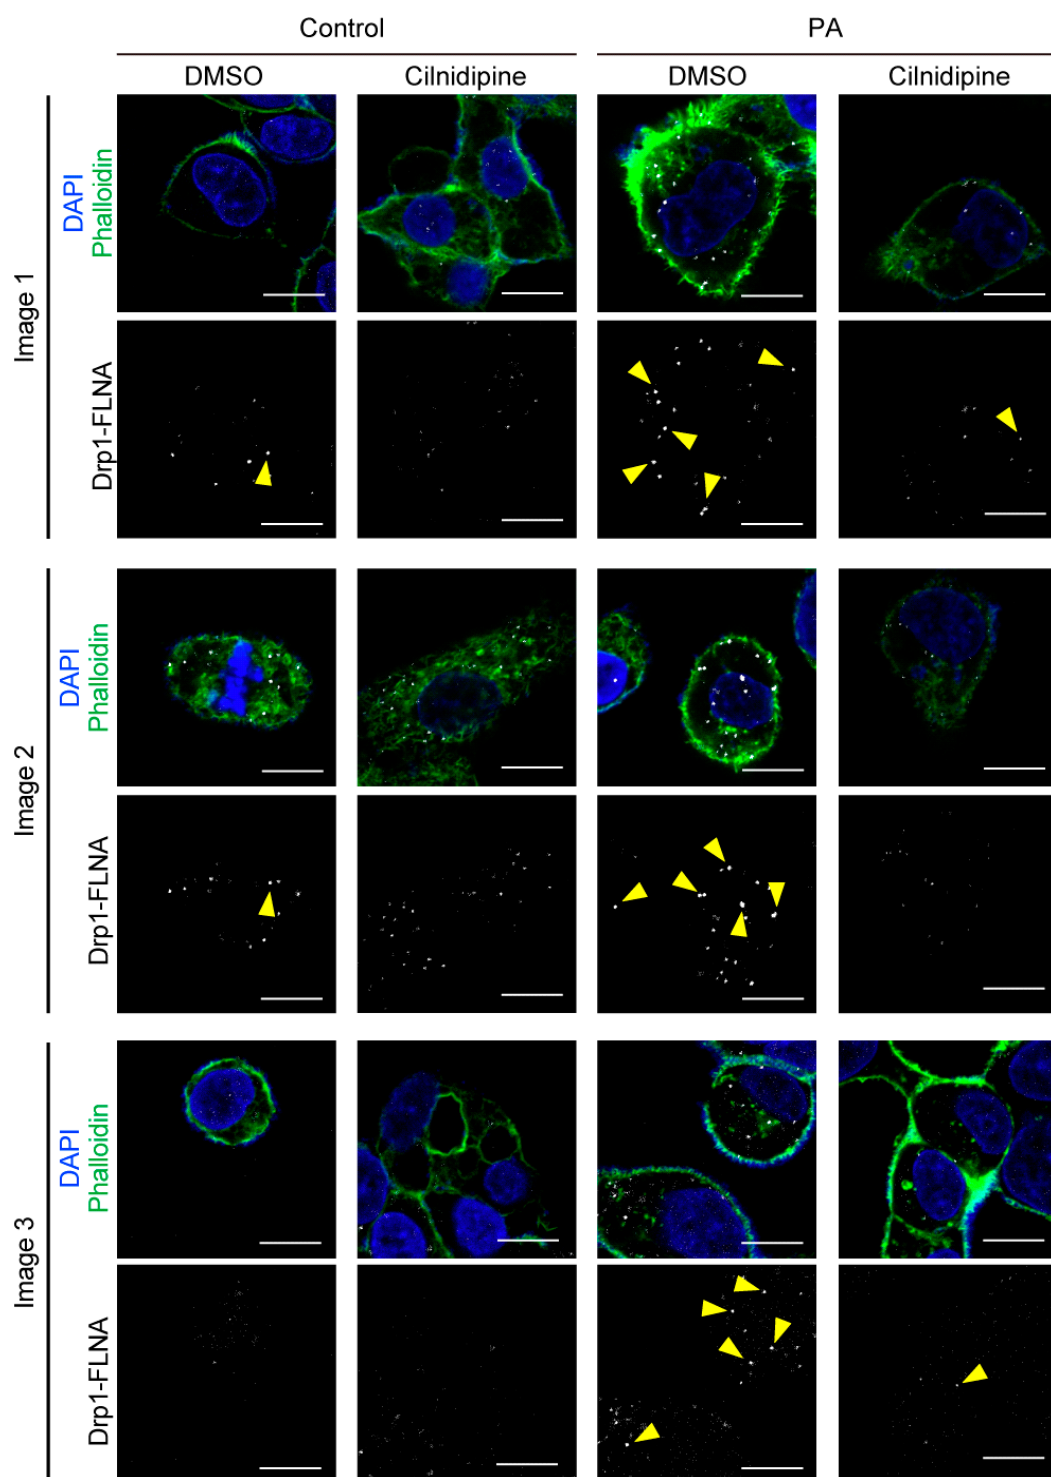

**Supplemental Figure S1. Effect of cilnidipine on the PA-induced Drp1-FLNA complex formation in HepG2.** Supplemental images of PLA between Drp1 and FLNA. PLA signals are shown as white spots (yellow arrowhead) counterstained with phalloidin (green) and DAPI (blue). HepG2 cells were treated with 30  $\mu$ M of PA with or without cilnidipine. Scale bars: 10  $\mu$ m.

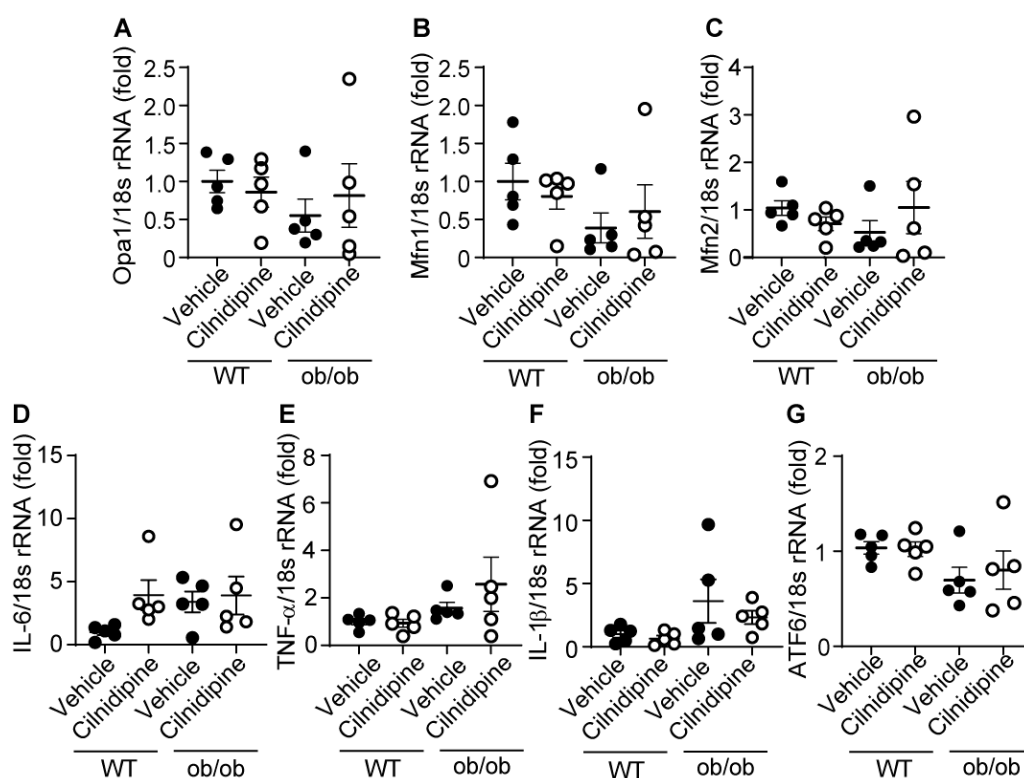

**Supplemental Figure S2. Changes in mRNA expression levels related to mitochondria fusion, inflammation, and ER stress in ob/ob mice.** (A–C) Gene expression of mitochondrial fusion-related proteins. The expression of Opa1 (A), Mfn1 (B), and Mfn2 (C). (D–F) Gene expression of inflammation-related proteins. The expression of IL-6 (D), TNF- $\alpha$  (E), and IL-1 $\beta$  (F). (G) The expression level of ATF6 gene. Data are means  $\pm$  SEM (n=5 mice in each group). Significance was determined using one-way ANOVA followed by Tukey's comparison test.

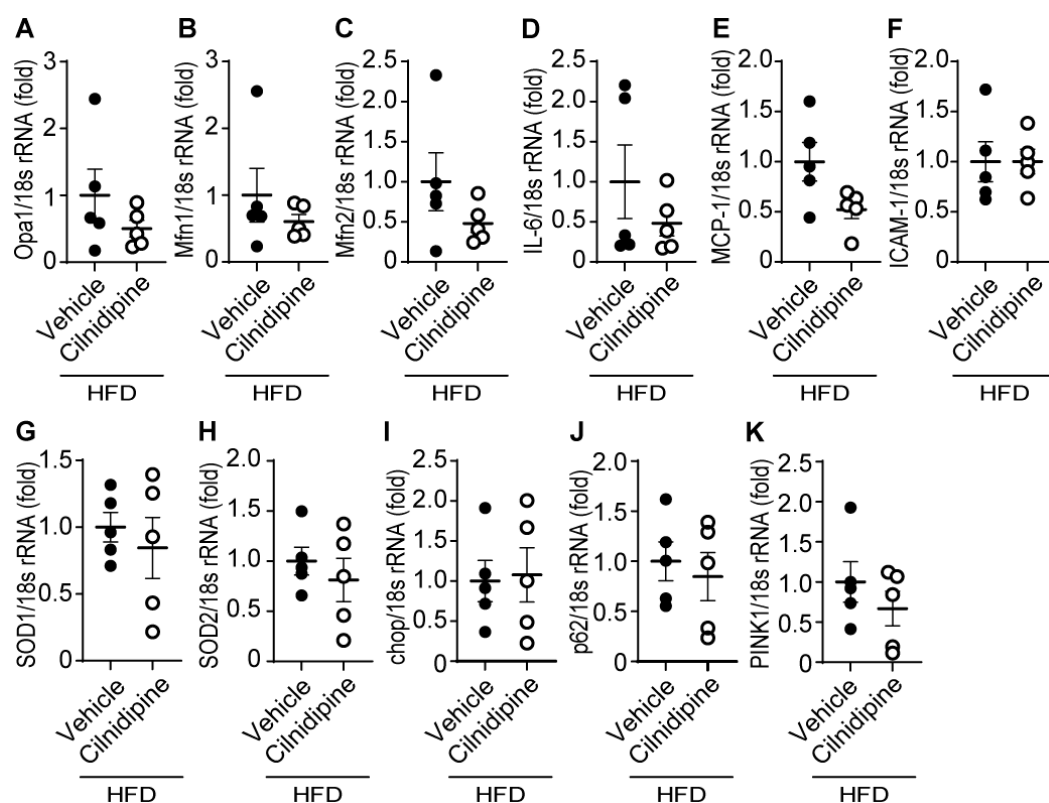

**Supplemental Figure S3. Changes in mRNA expression levels related to mitochondria fusion, inflammation, and ER stress in WT mice fed HFD.** (A–C) Gene expression of mitochondrial fusion-related proteins. The expression of Opa1 (A), Mfn1 (B), and Mfn2 (C). (D–F) Gene expression of inflammation-related proteins. The expression of IL-6 (D), MCP-1 (E), and ICAM-1 (F). (G, H) Gene expression of ROS-related proteins. The expression of SOD1 (G), and SOD2 (H). (I, J) Gene expression of ER stress-related proteins. The expression of chop (I), and p62 (J). (K) mRNA expression of PINK1. Data are means  $\pm$  SEM ( $n=5$  mice in each group). Significance was determined using one-way ANOVA followed by Tukey's comparison test.

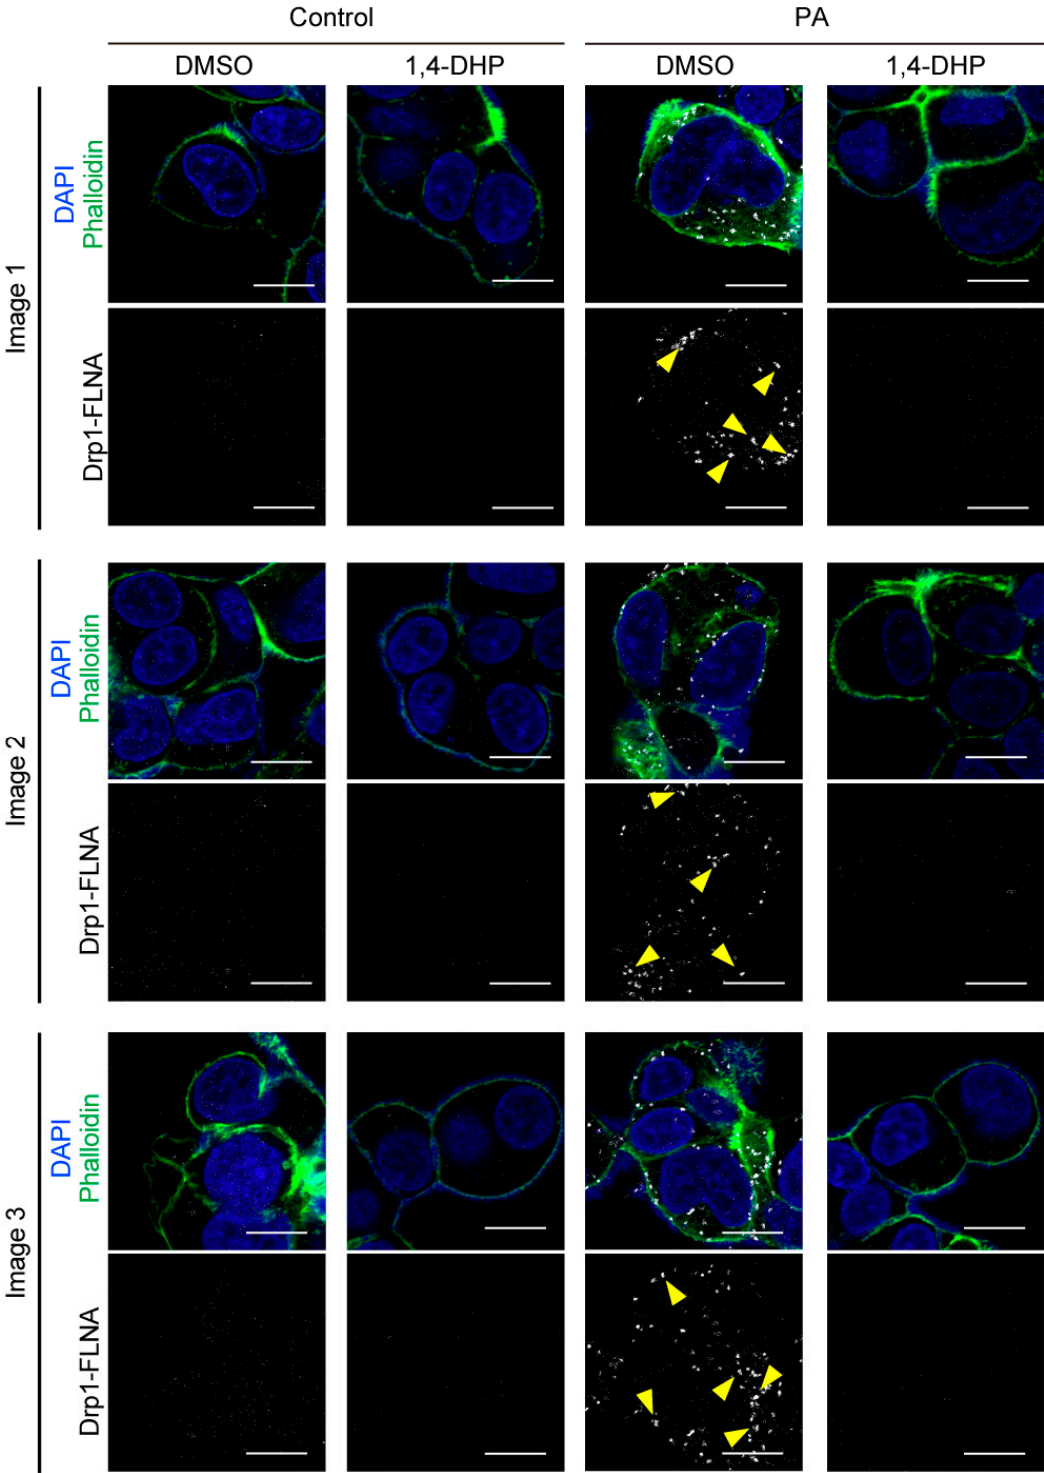

**Supplemental Figure S4. Effect of 1,4-DHP on the PA-induced Drp1-FLNA complex formation in HepG2.** Representative images of PLA between Drp1 and FLNA. PLA signals are shown as white spots (yellow arrowhead) counterstained with phalloidin (green) and DAPI (blue). HepG2 cells were treated with 30  $\mu$ M of PA with or without 1,4-DHP. Scale bars: 10  $\mu$ m.

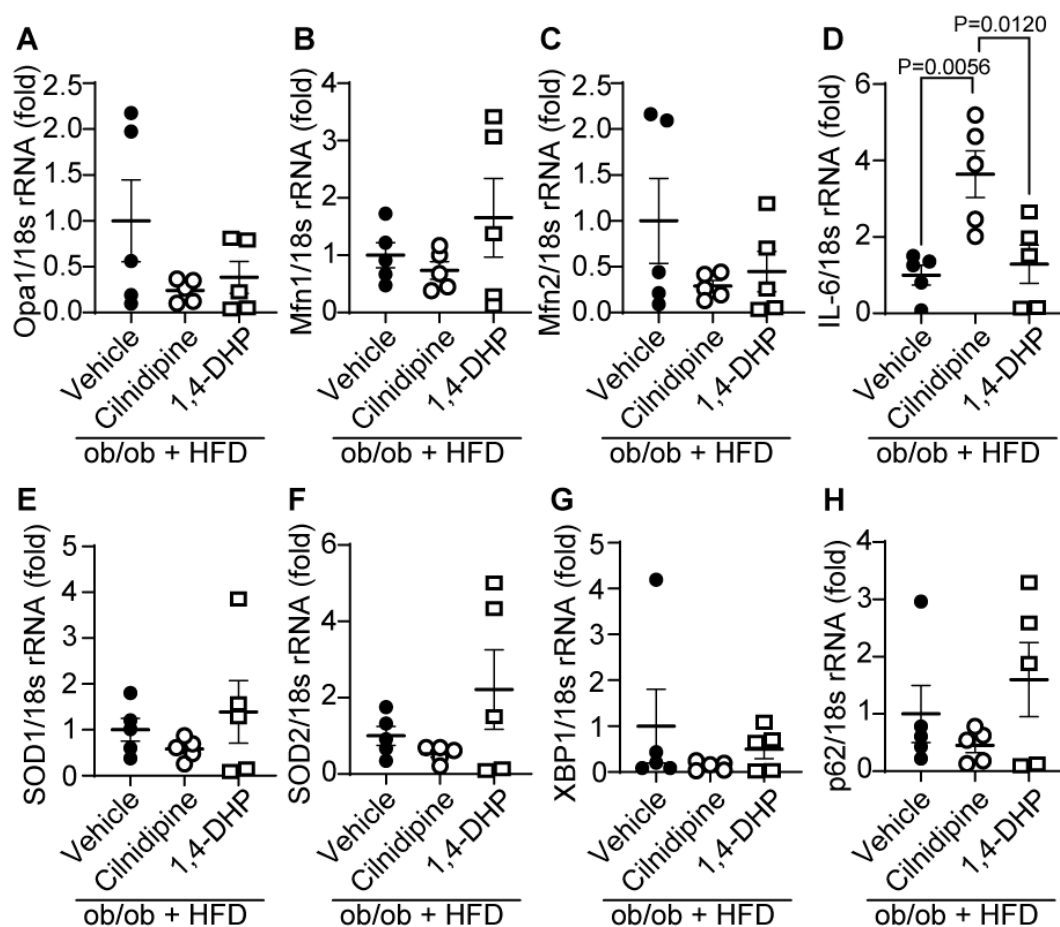

**Supplemental Figure S5. Changes in mRNA expression levels related to mitochondria fusion, inflammation, and ER stress in ob/ob mice fed HFD.** (A-C) Gene expression of mitochondrial fusion-related proteins. The expression of Opa1 (A), Mfn1 (B), and Mfn2 (C). (D) The expression of IL-6. (E, F) Gene expression of ROS. The expression of SOD1 (E), and SOD2 (F). (G, H) Gene expression of ER stress. The expression of XBP1 (G), and p62 (H). Data are means  $\pm$  SEM ( $n=5$  mice in each group). Significance was determined using one-way ANOVA followed by Tukey's comparison test.

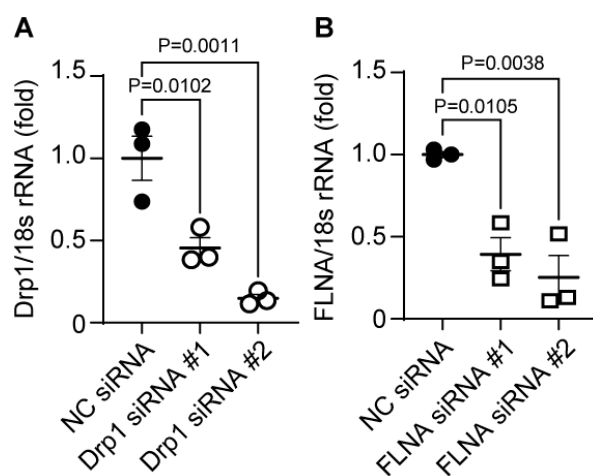

**Supplemental Figure S6. Knockdown efficiencies of siRNAs for Drp1 and FLNA in HepG2.** (A, B) mRNA expression levels of Drp1 (A), and FLNA (B) in HepG2 cells. Data are means  $\pm$  SEM ( $n=3$  in each group). Significance was determined using two-way ANOVA followed by Tukey's comparison test.

Supplementary Table S1 Primer list

| No. | Gene      |         | Primer Sequence (5' - 3')  |
|-----|-----------|---------|----------------------------|
| 1   | Drp1      | Forward | GATGCCATAGTTGAAGTGGTGAC    |
|     |           | Reverse | CCACAAGCATCAGCAAAGTCTGG    |
| 2   | FLNA      | Forward | CTTATCGCGCTGTTGGAGGT       |
|     |           | Reverse | GCCACCGACACGTTCTCAA        |
| 3   | Opa1      | Forward | TGGAAAATGGTTCGAGAGTCAG     |
|     |           | Reverse | CATTCCGTCTCTAGGTTAAAGCG    |
| 4   | Mfn1      | Forward | ATGGCAGAAACGGTATCTCCA      |
|     |           | Reverse | CTCGGATGCTATTCGATCAAGTT    |
| 5   | Mfn2      | Forward | GTGGAATACGCCAGTGAGAAGC     |
|     |           | Reverse | CAACTTGCTGGCACAGATGAGC     |
| 6   | IL-6      | Forward | AAGGGCCAGGGATCTGTAAG       |
|     |           | Reverse | TCTCTTGTTGCTCCCCAAAG       |
| 7   | TNF-alpha | Forward | ATGAGCACAGAAAGCATGATCCGC   |
|     |           | Reverse | CCAAAGTAGACCTGCCCCGACTC    |
| 8   | IL-1 beta | Forward | ATGGCAACTGTTCTGAAGTCAACT   |
|     |           | Reverse | CAGGACAGGTATAGATTCTTTCCTTT |
| 9   | MCP-1     | Forward | TTAAAAACCTGGATCGGAACCAA    |
|     |           | Reverse | GCATTAGCTTCAGATTTACGGGT    |
| 10  | ICAM1     | Forward | GTGTGCCATGCCTTTAGCTC       |
|     |           | Reverse | CTGATCTTTCTCTGGCGGTT       |
| 11  | SOD1      | Forward | AACCAGTTGTGTTGTCAGGAC      |
|     |           | Reverse | CCACCATGTTTCTTAGAGTGAGG    |
| 12  | SOD2      | Forward | CAGACCTGCCTTACGACTATGG     |
|     |           | Reverse | CTCGGTGGCGTTGAGATTGTT      |
| 13  | ATF6      | Forward | TCGCCTTTTAGTCCGGTTCTT      |
|     |           | Reverse | GGCTCCATAGGTCTGACTCC       |
| 14  | XBP1      | Forward | CTGAGTCCGAATCAGGTGCAG      |
|     |           | Reverse | GTCCATGGGAAGATGTTCTGG      |
| 15  | p62       | Forward | GCTGCCCTATACCCACATCT       |
|     |           | Reverse | CGCCTTCATCCGAGAAAC         |
| 16  | chop      | Forward | CACCACACCTGAAAGCAGAA       |
|     |           | Reverse | CGTTTCCTGGGGATGAGATA       |
| 17  | PINK1     | Forward | CTTATAGGAAAGGGCCCGGATGTCG  |
|     |           | Reverse | GATGATGTTAGGGTGTGGGGCAAGC  |

---

|    |               |         |                             |
|----|---------------|---------|-----------------------------|
| 18 | 18srRNA       | Forward | ATTAATCAAGAACGAAAGTCGCAGGT  |
|    |               | Reverse | TTTAAGTTTCAGCTTTGCAACCATACT |
| 19 | Human 18srRNA | Forward | CTACCACATCCAAGGAAGCA        |
|    |               | Reverse | TTTTTCGTCACTACCTCCCCG       |
